# Supplementary material
Source: HighWire-hosted journal article supplement (https://jnm.snmjournals.org/highwire/filestream/94786/field_highwire_adjunct_files/0/160366_Supplemental_Data.pdf)
Supplement: 160366_Supplemental_Data.pdf [file 160366_Supplemental_Data.pdf]

## <sup>125</sup>I Uptake Assay

ATC cells were plated in 24-well plates for 24 h. To inhibit the iodide uptake, vehicle-treated ATC cells were preincubated with 300  $\mu$ M KClO<sub>4</sub> (as a specific inhibitor of NIS) for 30 min. After aspiration of the medium, the cells were washed with 1 mL of HBSS and incubated with 500  $\mu$ L of Hanks balanced salt solution (HBSS) containing 0.5% bovine serum albumin (bHBSS), 3.7 kBq of carrier-free <sup>125</sup>I (Perkin-Elmer), and a 10  $\mu$ mol/L solution of sodium iodide (specific activity of 740 MBq/mmol) at 37°C for 30 min. The cells were then washed twice with ice-cold bHBSS and were lysed with 500  $\mu$ L of 2% sodium dodecyl sulfate (SDS). The radioactivity was measured using a  $\gamma$  counter (Cobra II; Canberra Packard, Packard Bioscience). The radioactivity of the cells was normalized using total protein concentrations determined by a BCA kit (Pierce Protein Biology).

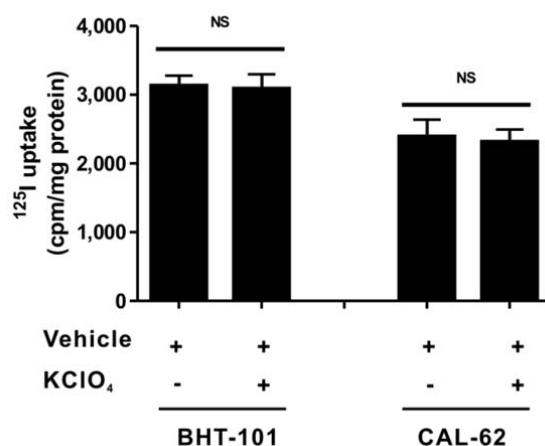

**Supplemental Fig 1.** Comparison of iodide uptake between vehicle-treated and vehicle + KClO<sub>4</sub>-treated ATC cells. Each cell was treated with vehicle for 24 h. Before iodide uptake, 300  $\mu$ M KClO<sub>4</sub> was incubated with each cell lines for 30 min; afterward, the iodide uptake levels of both cell lines were confirmed. NS = not significant when compared with vehicle + KClO<sub>4</sub> cells. All data are expressed as mean  $\pm$  SD;  $n = 3$ .

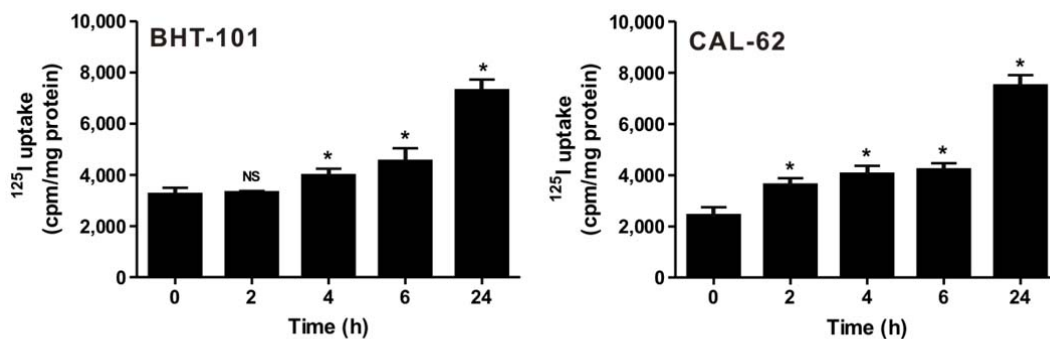

**Supplemental Fig 2.** The change in iodide uptake in GSK5182-treated cells according to time course. \* $P < 0.05$ ; NS = not significant when compared with untreated cells. All data are expressed as mean  $\pm$  SD;  $n = 3$ .

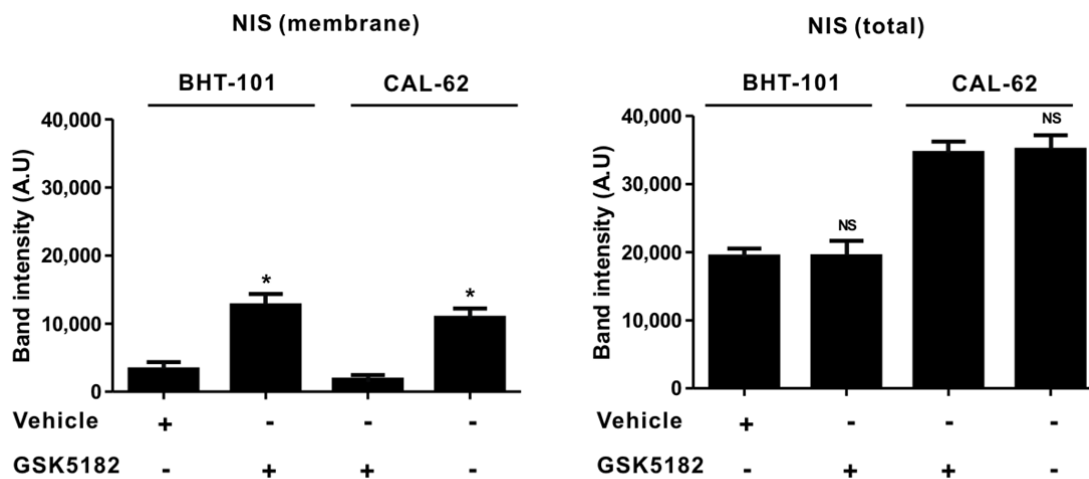

**Supplemental Fig 3.** Quantitative analysis of membrane and total NIS protein levels by scanning densitometry. Data are mean  $\pm$  SD of 3 samples per group expressed in arbitrary units. \* $P < 0.05$ , when compared with untreated cells. NS = not significant when compared with vehicle.

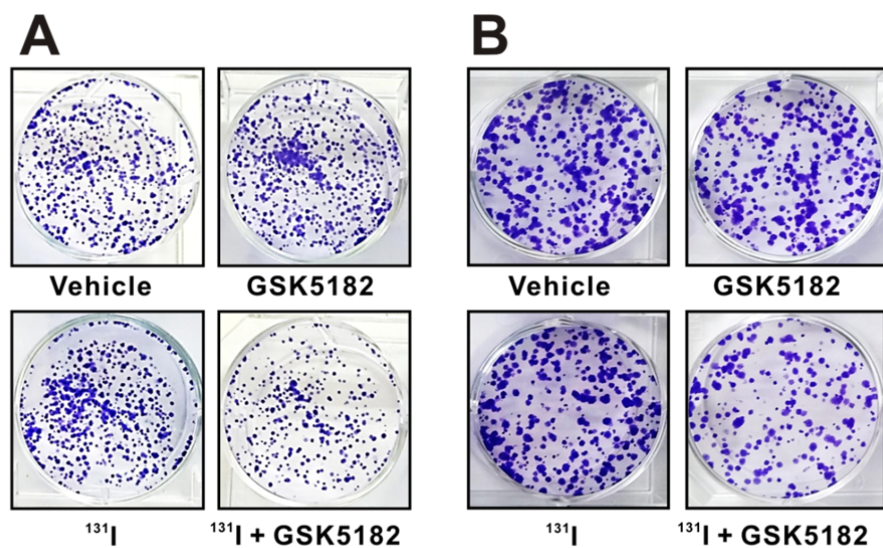

**Supplemental Fig 4.** Representative photographs of plates of CAL-62 (A) and BHT-101 (B) cells after clonogenic assay.
